# Supplementary material for: Desmoplastic Small Round Cell Tumor of the Uterus: A Report of Molecularly Confirmed Case with EWSR1-WT1 Fusion
Source: MDPI journal article supplement (doi:10.3390/diagnostics12051184), 2022-05-10
Supplement: s1 [file s1]

Supplementary Table S1. List of immunohistochemical antibodies

| Antibody    | Clone         | Dilution | Producer                                       | Platform                                            | Detection               |
|-------------|---------------|----------|------------------------------------------------|-----------------------------------------------------|-------------------------|
| transgelin  | 2A10C2        | 1:300    | Cell Marque, Rocklin, CA, USA                  | Ventana BenchMark ULTRA (Roche, Basel, Switzerland) | OptiView                |
| CD56        | 123C3.D5      | 1:25     | Zeta Corporation, Sierra Madre, CA, USA        | PT-link (Agilent, Santa Clara, CA, USA)             | EnVision FLEX (Agilent) |
| CD57        | TB01          | 1:100    | Dako, Glostrup, Denmark                        | PT-link (Agilent, Santa Clara, CA, USA)             | EnVision FLEX (Agilent) |
| EMA         | E29           | 1:200    | Dako, Glostrup, Denmark                        | PT-link (Agilent, Santa Clara, CA, USA)             | EnVision FLEX (Agilent) |
| cyclin D1   | EP12          | RTU      | Dako, Glostrup, Denmark                        | Ventana BenchMark ULTRA (Roche, Basel, Switzerland) | OptiView                |
| CD10        | 56C6          | 1:50     | Novocastra, Leica Biosystems, Wetzlar, Germany | Ventana BenchMark ULTRA (Roche, Basel, Switzerland) | OptiView                |
| desmin      | D33           | 1:200    | Dako, Glostrup, Denmark                        | Ventana BenchMark ULTRA (Roche, Basel, Switzerland) | OptiView                |
| h-caldesmon | h-CD          | 1:50     | Novocastra, Leica Biosystems, Wetzlar, Germany | PT-link (Agilent, Santa Clara, CA, USA)             | EnVision FLEX (Agilent) |
| cytokeratin | AE1/AE3       | 1:200    | Dako, Glostrup, Denmark                        | Dako Omnis, Agilent, Santa Clara, CA, USA           | EnVision FLEX (Agilent) |
| BerEP4      | BerEP4        | 1:100    | Dako, Glostrup, Denmark                        | PT-link (Agilent, Santa Clara, CA, USA)             | EnVision FLEX (Agilent) |
| NSE         | BBS-NC-VI-H14 | 1:400    | Dako, Glostrup, Denmark                        | PT-link (Agilent, Santa Clara, CA, USA)             | EnVision FLEX (Agilent) |
| IFITM1      | -             | 1:300    | Abcam, Cambridge, United Kingdom               | PT-link (Agilent, Santa Clara, CA, USA)             | EnVision FLEX (Agilent) |

|               |               |       |                                     |                                                        |                               |
|---------------|---------------|-------|-------------------------------------|--------------------------------------------------------|-------------------------------|
| WT1           | 6F-H2         | 1:100 | Dako, Glostrup,<br>Denmark          | PT-link (Agilent, Santa Clara,<br>CA, USA)             | EnVision<br>FLEX<br>(Agilent) |
| p53           | BP 53-12      | 1:200 | Zytomed Systems,<br>Berlin, Germany | PT-link (Agilent, Santa Clara,<br>CA, USA)             | EnVision<br>FLEX<br>(Agilent) |
| Ki-67         | MIB1          | 1:100 | Dako, Glostrup,<br>Denmark          | Ventana BenchMark ULTRA<br>(Roche, Basel, Switzerland) | UltraView                     |
| myogenin      | FD5           | 1:50  | Dako, Glostrup,<br>Denmark          | PT-link (Agilent, Santa Clara,<br>CA, USA)             | EnVision<br>FLEX<br>(Agilent) |
| synaptophysin | DAK-<br>SYNAP | 1:100 | Dako, Glostrup,<br>Denmark          | Dako Omnis, Agilent, Santa<br>Clara, CA, USA           | EnVision<br>FLEX<br>(Agilent) |
| chromogranin  | LK2H10        | 1:400 | Zytomed Systems,<br>Berlin, Germany | PT-link (Agilent, Santa Clara,<br>CA, USA)             | EnVision<br>FLEX<br>(Agilent) |
| PAX8          | -             | 1:50  | Cell Marque, Rocklin,<br>CA, USA    | Dako Omnis, Agilent, Santa<br>Clara, CA, USA           | EnVision<br>FLEX<br>(Agilent) |
| CD117         | -             | 1:200 | Dako, Glostrup,<br>Denmark          | Ventana BenchMark ULTRA<br>(Roche, Basel, Switzerland) | UltraView                     |
